# Supplementary material for: Investigating the order–disorder phase transition in Nd2−xYxZr2O7via diffraction and spectroscopy
Source: Royal Society of Chemistry journal article supplement (doi:10.1039/c3dt51420j), 2013-01-01
Supplement: c3dt51420j.pdf [file c3dt51420j.pdf]

## Supporting Information

### *Investigating the order-disorder phase transition in $Nd_{2-x}Y_xZr_2O_7$ via diffraction and spectroscopy*

Peter E. R. Blanchard, Samuel Liu, Brendan J. Kennedy\* Chris D. Ling

*School of Chemistry, The University of Sydney, Sydney, NSW 2006, Australia*

Zhaoming Zhang, Max Avdeev

*Australian Nuclear Science and Technology Organisation, Lucas Heights, NSW 2234, Australia*

Bruce C. C. Cowie, Lars Thomsen

*Australian Synchrotron, 800 Blackburn Road, Clayton, Victoria 3168, Australia*

Ling-Yun Jang

*Facility Utilization Group, Experiment Facility Division, National Synchrotron Radiation Research Center, Hsinchu 30076, Taiwan*

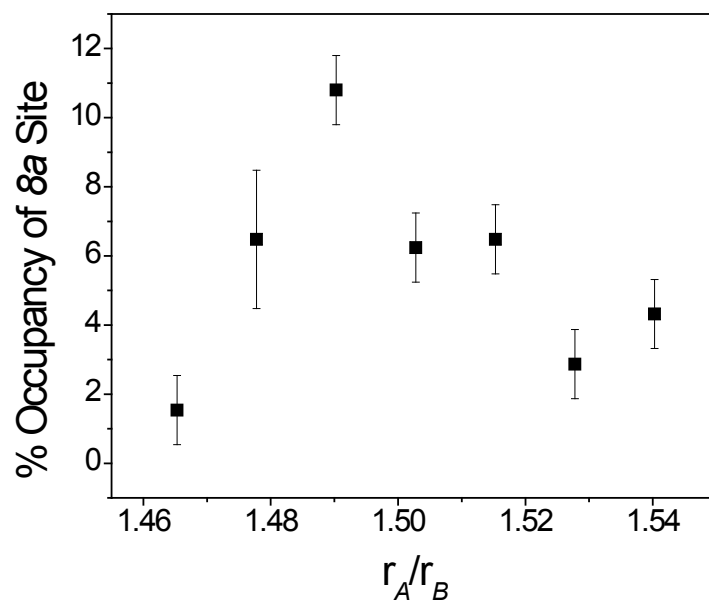

Figure S1. Plot of the percent occupancy of the  $\delta a$  site as a function of the radius ratio of the  $A$  and  $B$ -site cations ( $r_A/r_B$ )
